# Supplementary material
Source: MDPI journal article supplement (https://www.mdpi.com/2073-4344/12/9/980)
Supplement: s1 [file s1]

SUPPLEMENTARY MATERIALS:

# Green Chemo-Enzymatic Protocols for Synthesis of Enantiopure $\beta$ -Blockers (S)-Esmolol and (S)-Penbutolol

Susanne Hansen Trøøyen, Lucas Bocquin, Anna Lifen Tennfjord, Kristoffer Klungseth and Elisabeth Egholm Jacobsen \*

Department of Chemistry, Norwegian University of Science and Technology Høgskoleringen 5, 7491 Trondheim, Norway

\* Correspondence: elisabeth.e.jacobsen@ntnu.no

## Spectroscopic and chromatographic analysis data

### Methyl 3-(4-(oxiran-2-ylmethoxy)phenyl)propanoate (2)

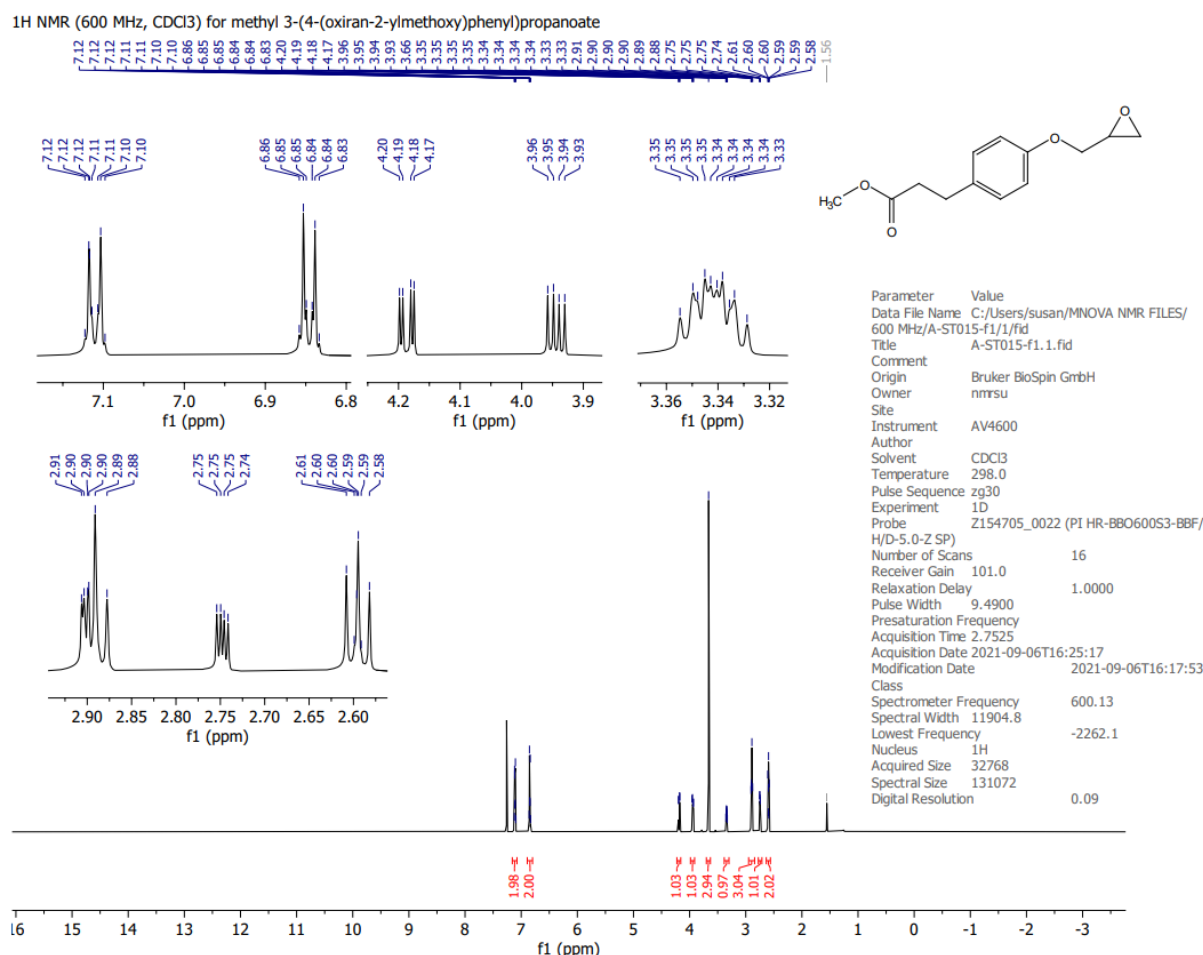

**Figure S1.** <sup>1</sup>H NMR spectrum (600 MHz, CDCl<sub>3</sub>) of methyl 3-(4-(oxiran-2-ylmethoxy)phenyl)propanoate (2).

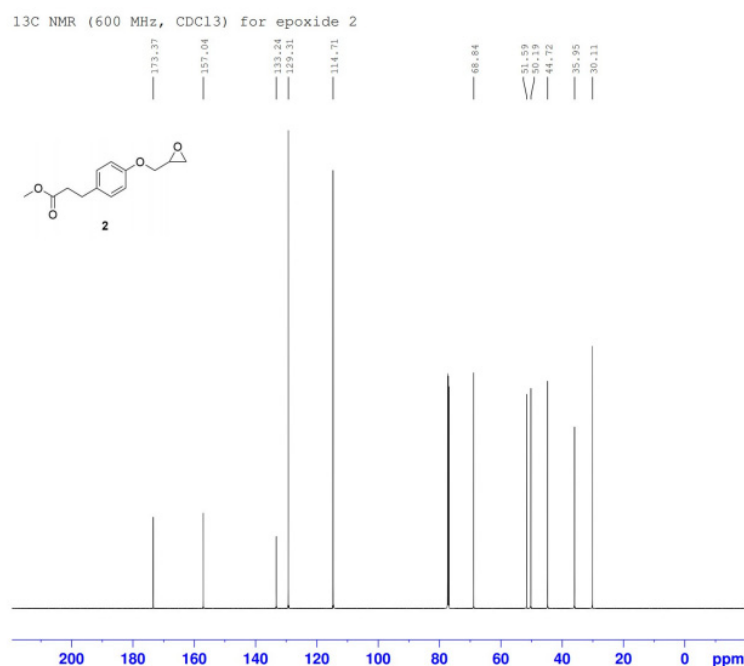

**Figure S2.** <sup>13</sup>C NMR spectrum (150 MHz, CDCl<sub>3</sub>) of methyl 3-(4-(oxiran-2-ylmethoxy)phenyl)propanoate (2).

*Methyl 3-(4-(3-chloro-2-hydroxypropoxy)phenyl)propanoate (3)*

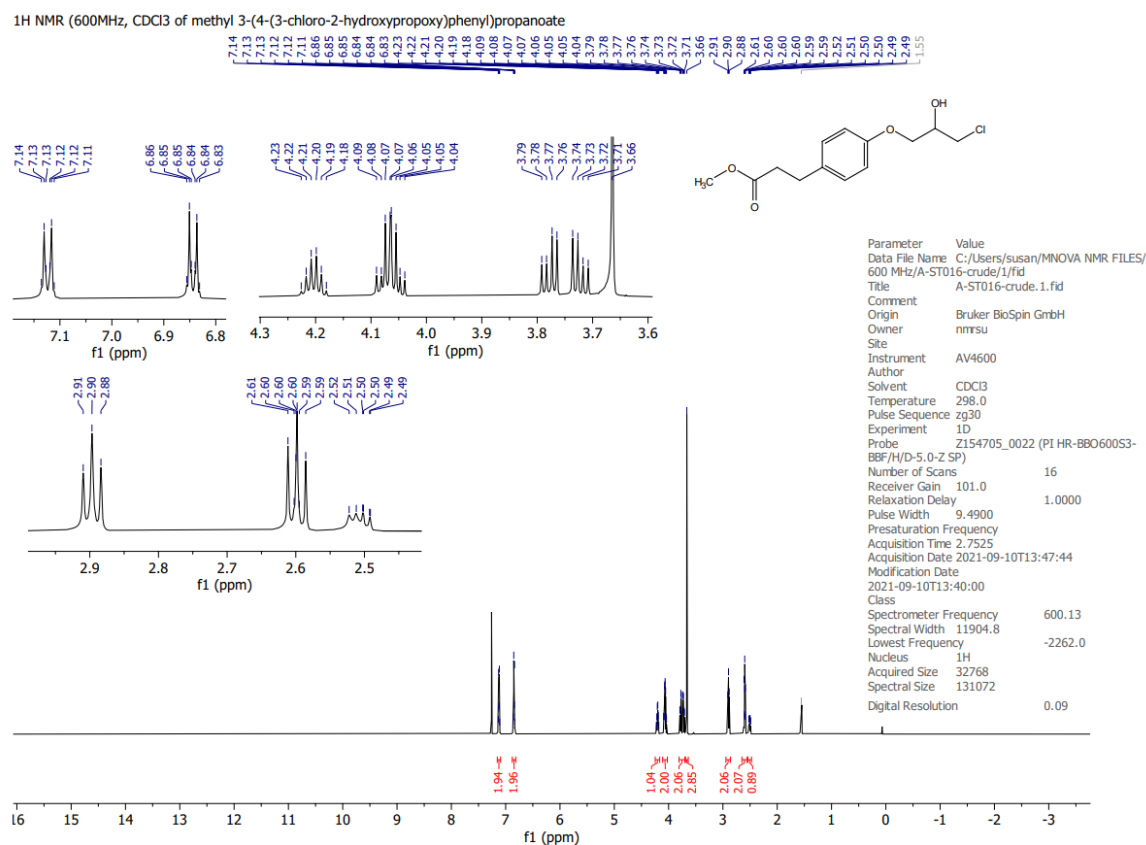

**Figure S3.** <sup>1</sup>H NMR spectrum (600 MHz, CDCl<sub>3</sub>) of methyl 3-(4-(3-chloro-2-hydroxypropoxy)phenyl)propanoate (3).

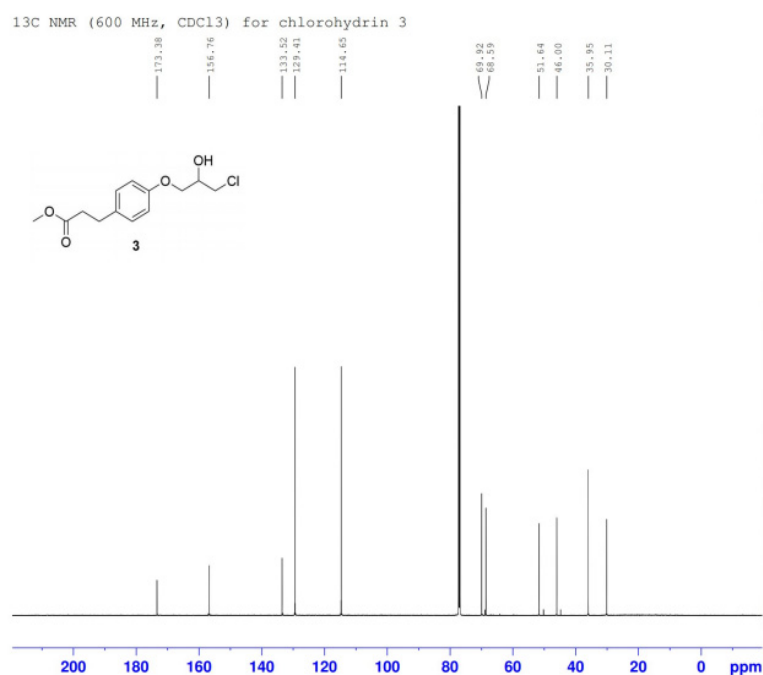

**Figure S4.** <sup>13</sup>C NMR spectrum (150 MHz, CDCl<sub>3</sub>) of methyl 3-(4-(3-chloro-2-hydroxypropoxy)phenyl)propanoate (3).

*(S)*-1-Chloro-3-(4-(3-methoxy-3-oxopropyl)phenoxy)propan-2-yl butanoate ((S)-4)

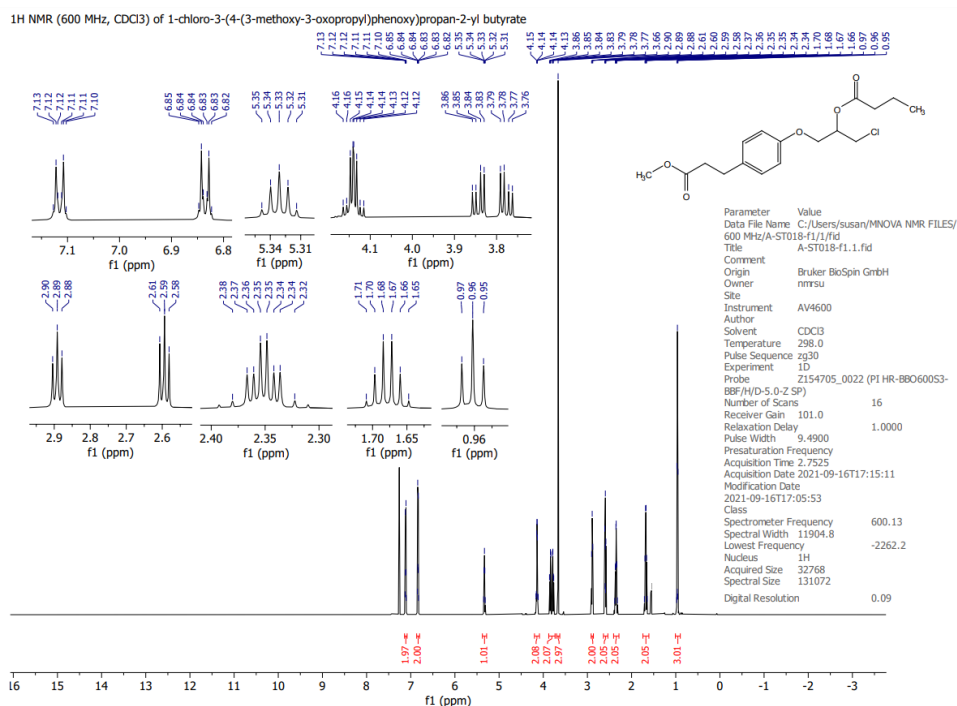

**Figure S5.** <sup>1</sup>H NMR spectrum (600 MHz, CDCl<sub>3</sub>) of *(S)*-1-chloro-3-(4-(3-methoxy-3-oxopropyl)phenoxy)propan-2-yl butanoate ((S)-4).

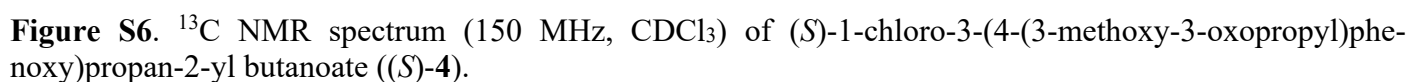

*Esmolol (5)*

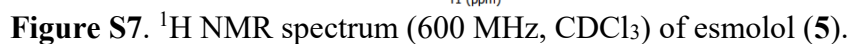

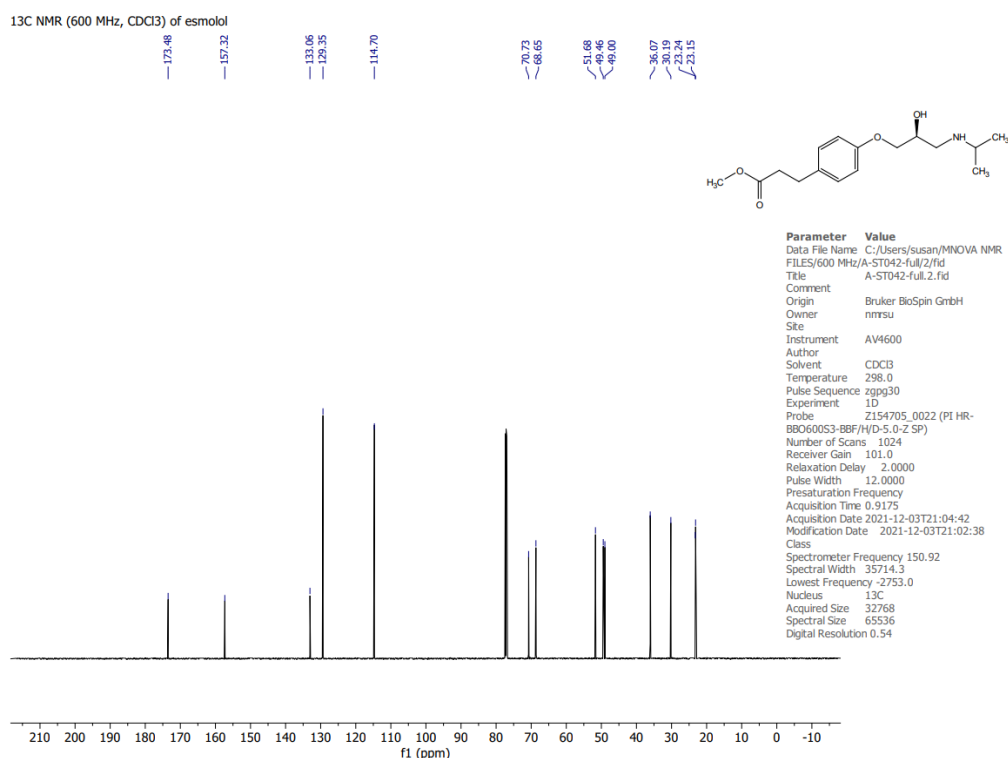

Figure S8. <sup>13</sup>C NMR spectrum (150 MHz, CDCl<sub>3</sub>) of esmolol (5).

### 1-Chloro-3-(2-cyclopentylphenoxy)propan-2-ol (8)

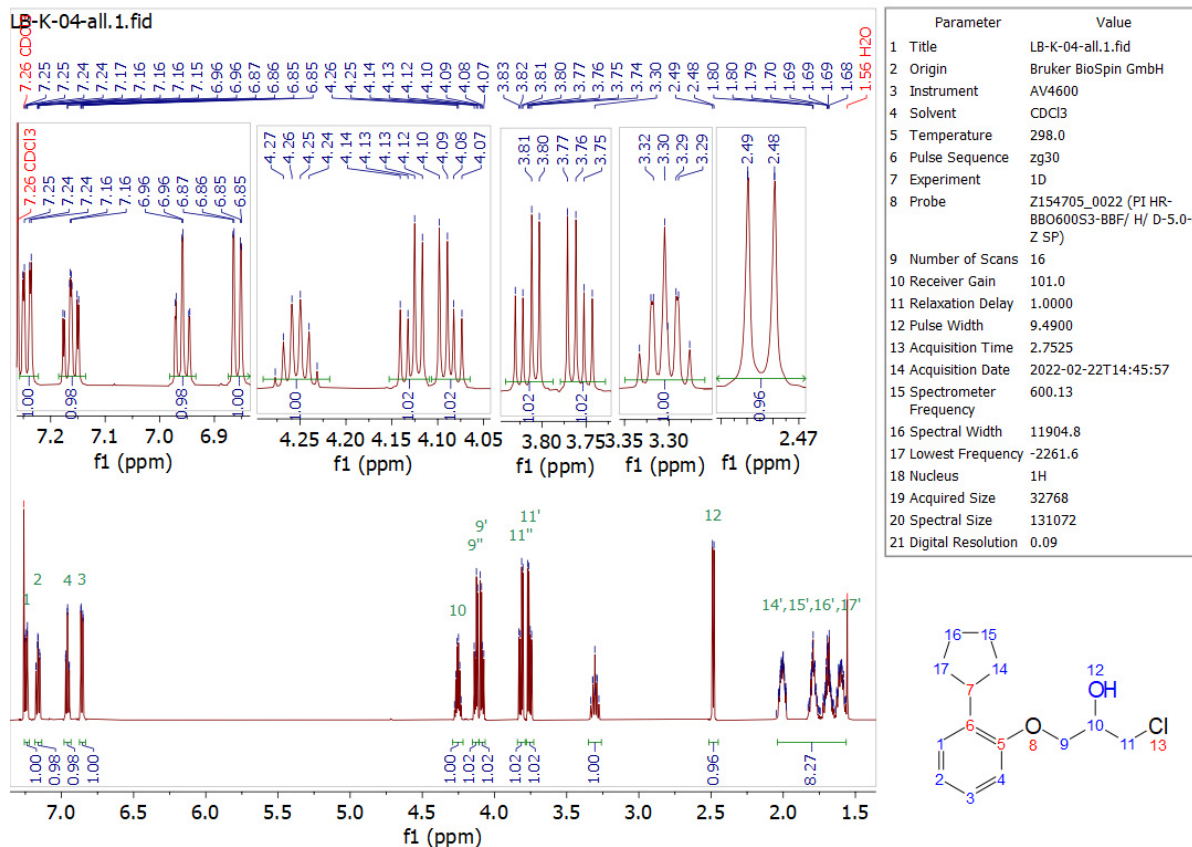

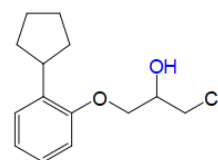

*Penbutolol (10)*

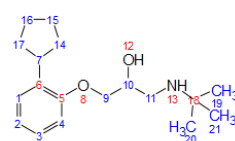

**Figure S11.**  $^1\text{H}$  NMR spectrum (600 MHz,  $\text{CDCl}_3$ ) of penbutolol (**10**).

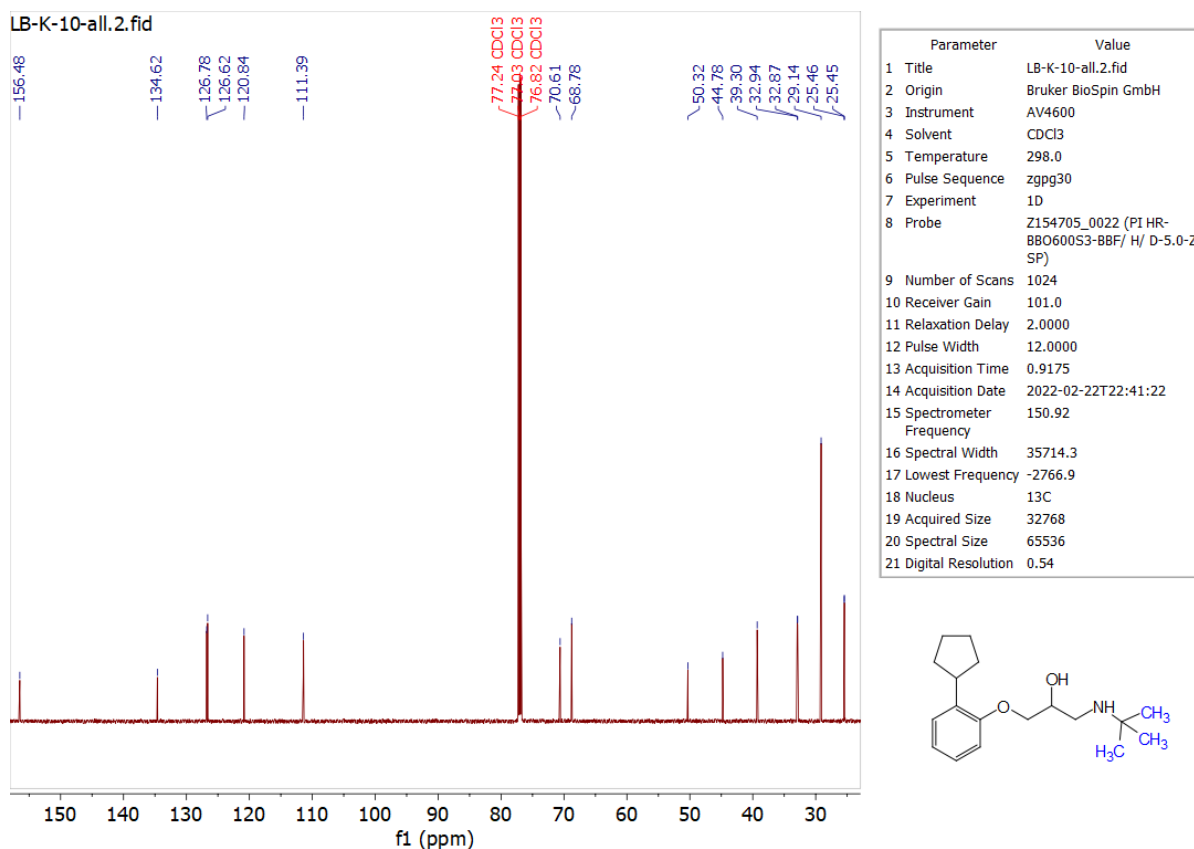

**Figure S12.**  $^{13}\text{C}$  NMR spectrum (150 MHz,  $\text{CDCl}_3$ ) of penbutolol (**10**)

### Penbutolol hydrochloride (**10**·HCl)

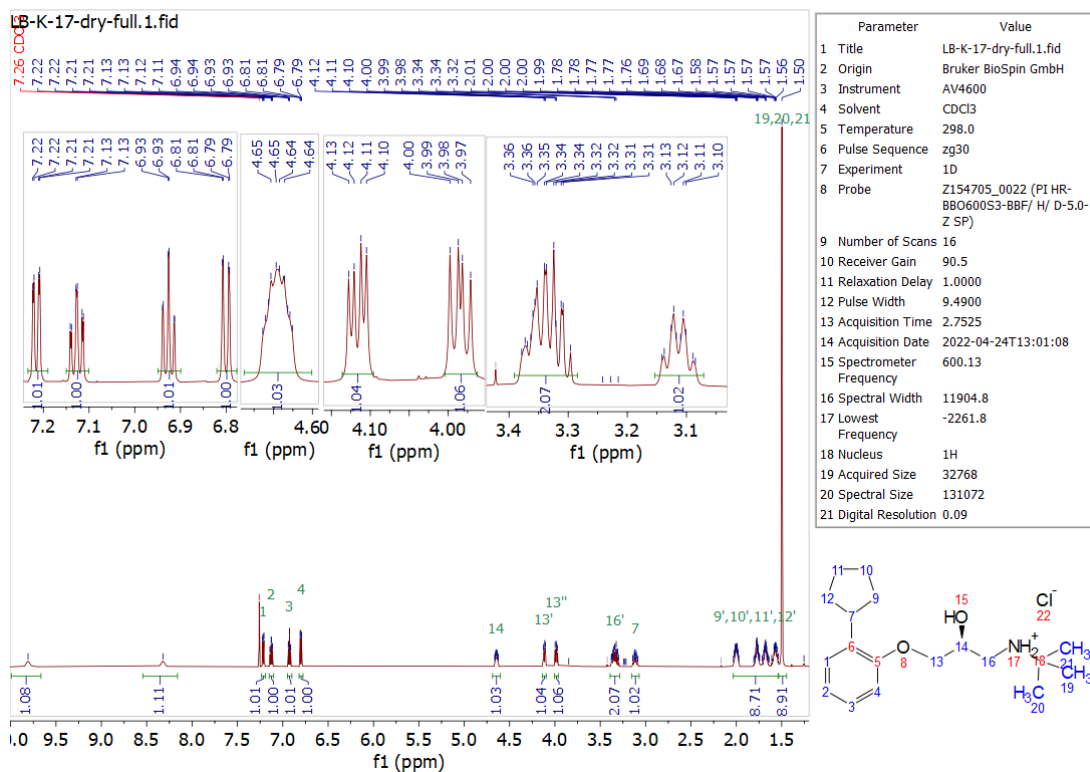

**Figure S13.**  $^1\text{H}$  NMR spectrum (600 MHz,  $\text{CDCl}_3$ ) of penbutolol hydrochloride (**10**·HCl).

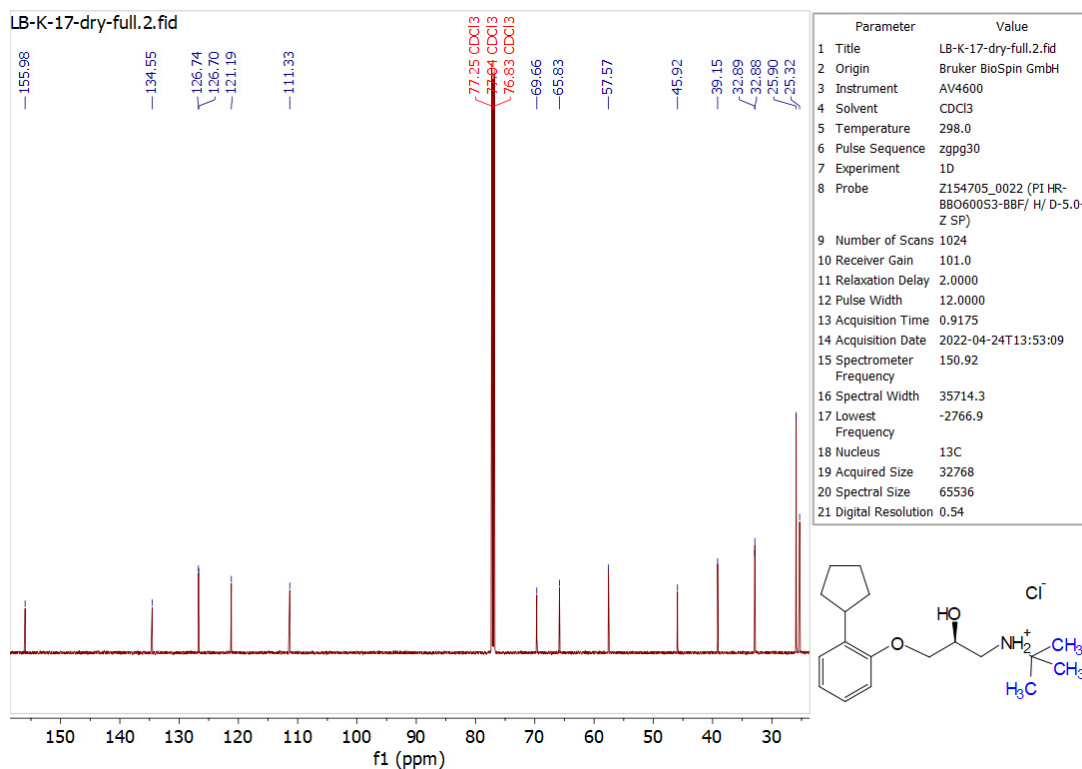

**Figure S14.**  $^{13}\text{C}$  NMR spectrum (150 MHz,  $\text{CDCl}_3$ ) of penbutolol hydrochloride (**10**·HCl).



## HPLC DATA

*Methyl 3-(4-(3-chloro-2-hydroxypropoxy)phenyl)propanoate (3)*

Data File C:\CHEM32\1\DATA\SUSANNE HANSEN TROØYEN\20220410\_A-ST016\_NEW\_RAC\_CHLOROXYDR\_C.D  
 Sample Name: A-ST016\_rac\_chlorohydrin

```
=====
Acq. Operator   : Susanne
Acq. Instrument : Instrument 1                      Location : Vial 4
Injection Date  : 10.04.2022 01:41:57
                                           Inj Volume : 10 µl
Acq. Method     : C:\CHEM32\1\METHODS\ELISABETH JACOBSEN\KIRAL_SHT_1.M
Last changed    : 10.04.2022 01:36:59 by Susanne
Analysis Method : C:\CHEM32\1\DATA\SUSANNE HANSEN TROØYEN\20220410_A-ST016_NEW_RAC_
                  CHLOROXYDR_C.D\DA.M (KIRAL_SHT_1.M)
Last changed    : 10.04.2022 01:58:14 by Lucas
Method Info     : Kiral separasjon med Chiralcel OD-H kolonne 250x4.6mm, 5µm
                  Solventer: Heksan + ipa

Sample Info     : 80% hexane 20% IPA sep of racemic chlorohydrin in n-hex
                  ane (esmolol)
=====
```

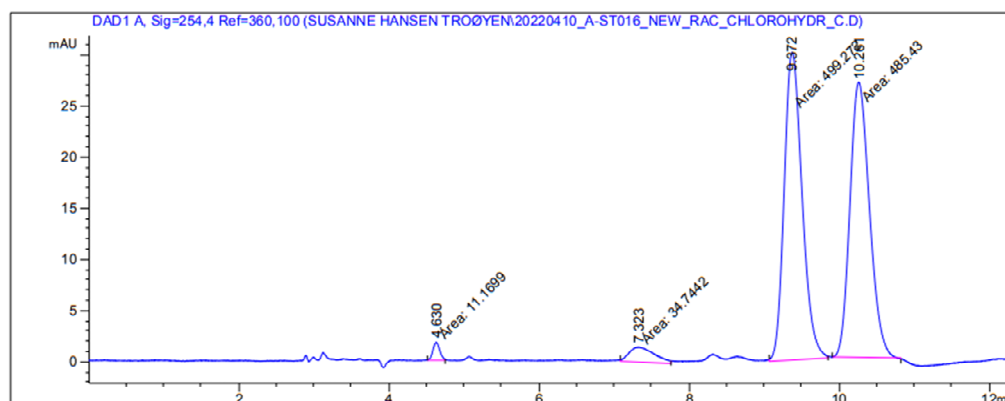

## Area Percent Report

```
Sorted By      : Signal
Multiplier     : 1.0000
Dilution       : 1.0000
Use Multiplier & Dilution Factor with ISTDs
```

Signal 1: DAD1 A, Sig=254,4 Ref=360,100

| Peak # | RetTime [min] | Type | Width [min] | Area [mAU*s] | Height [mAU] | Area %  |
|--------|---------------|------|-------------|--------------|--------------|---------|
| 1      | 4.630         | MM   | 0.1039      | 11.16994     | 1.79215      | 1.0838  |
| 2      | 7.323         | MM   | 0.3935      | 34.74419     | 1.47159      | 3.3712  |
| 3      | 9.372         | MM   | 0.2763      | 499.27225    | 30.11242     | 48.4440 |
| 4      | 10.261        | MM   | 0.3003      | 485.43021    | 26.93867     | 47.1010 |

Totals : 1030.61659 60.31484

\*\*\* End of Report \*\*\*

**Figure S15.** Chiral HPLC chromatogram of chlorohydrin **3**. The analysis was performed on a Chiralcel OD-H column with *n*-hexane and *i*-PrOH (80:20) as eluent and 1 mL/min flow, and with a detection wavelength of 254 nm. The retention times obtained are  $t_R((S)\text{-}\mathbf{3}) = 9.4$  min and  $t_R((R)\text{-}\mathbf{3}) = 10.3$  min.  $R_S((S)/(R)\text{-}\mathbf{3}) = 1.86$ .

**(R)-Methyl 3-(4-(3-chloro-2-hydroxypropoxy)phenyl)propanoate ((R)-3)**

Data File C:\CHEM32\1\DATA\SUSANNE HANSEN TROØYEN\20220413\_A-ST067\_ALCOHOL\_LOW.C.D

Sample Name: A-ST067-F2-chloro\_lowc

```

=====
Acq. Operator   : Susanne
Acq. Instrument : Instrument 1                Location : Vial 3
Injection Date  : 13.04.2022 12:52:22
                                           Inj Volume : 10 µl
Acq. Method     : C:\CHEM32\1\METHODS\ELISABETH JACOBSEN\KIRAL_SHT_1.M
Last changed    : 13.04.2022 12:33:23 by Susanne
Analysis Method : C:\CHEM32\1\DATA\SUSANNE HANSEN TROØYEN\20220413_A-ST067_ALCOHOL_LOW.C.D\DA.
                                           M (KIRAL_SHT_1.M)
Last changed    : 15.04.2022 05:11:51 by Lucas
Method Info     : Kiral separasjon med Chiralcel OD-H kolonne 250x4.6mm, 5µm
                                           Solventer: Heksan + ipa

Sample Info     : 80% hexane 20% IPA chlorohydrin sep for esmolol
=====

```

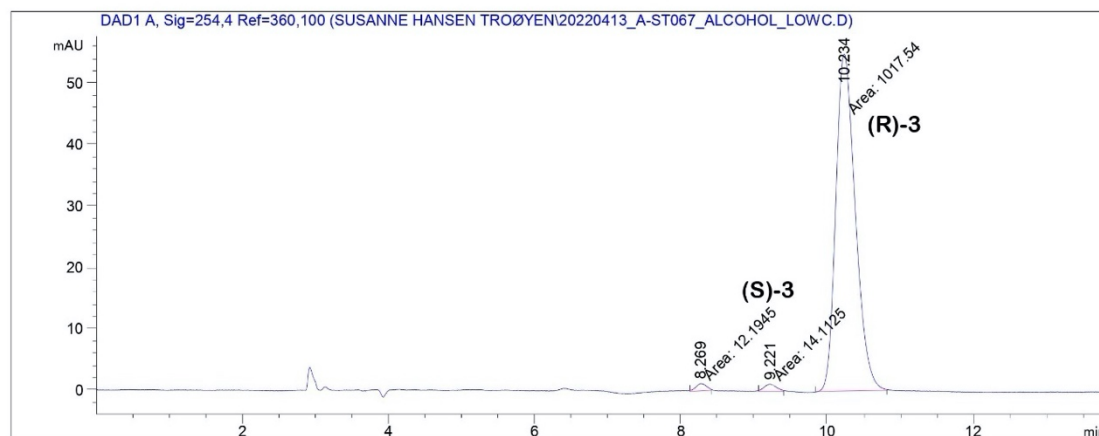

## Area Percent Report

```

=====
Sorted By      : Signal
Multiplier     : 1.0000
Dilution       : 1.0000
Use Multiplier & Dilution Factor with ISTDs

```

Signal 1: DAD1 A, Sig=254,4 Ref=360,100

| Peak # | RetTime [min] | Type | Width [min] | Area [mAU*s] | Height [mAU] | Area %  |
|--------|---------------|------|-------------|--------------|--------------|---------|
| 1      | 8.269         | MM   | 0.1678      | 12.19451     | 1.21100      | 1.1682  |
| 2      | 9.221         | MM   | 0.1956      | 14.11250     | 1.20225      | 1.3520  |
| 3      | 10.234        | MM   | 0.3090      | 1017.54163   | 54.88408     | 97.4798 |

Totals : 1043.84863 57.29733

```

=====
*** End of Report ***

```

**Figure S16.** Chiral HPLC chromatogram of (R)-chlorohydrin (R)-3. The analysis was performed on a Chiralcel OD-H column with *n*-hexane and *i*-PrOH (80:20) as eluent and 1 mL/min flow, and with a detection wavelength of 254 nm. The retention times obtained are  $t_R((S)-3) = 9.2$  min and  $t_R((R)-3) = 10.2$  min.  $R_S((S)/(R)-3) = 1.86$ .

**(S)-1-chloro-3-(4-(3-methoxy-3-oxopropyl)phenoxy)propan-2-yl butanoate ((S)-4)**

Data File C:\CHEM32\1\DATA\SUSANNE HANSEN TROØYEN\20220416\_A-ST067\_S-ESTER\_PUR.D

Sample Name: A-ST067-ester

```

=====
Acq. Operator   : Susanne
Acq. Instrument : Instrument 1          Location : Vial 2
Injection Date  : 16.04.2022 01:08:13
                                           Inj Volume : 10 µl
Acq. Method     : C:\CHEM32\1\METHODS\ELISABETH JACOBSEN\KIRAL_SHT_1.M
Last changed    : 16.04.2022 01:07:32 by Susanne
Analysis Method : C:\CHEM32\1\DATA\SUSANNE HANSEN TROØYEN\20220416_A-ST067_S-ESTER_PUR.D\DA.M
                  (KIRAL_SHT_1.M)
Last changed    : 16.04.2022 01:30:38 by Susanne
Method Info     : Kiral separasjon med Chiralcel OD-H kolonne 250x4.6mm, 5µm
                  Solventer: Heksan + ipa

Sample Info     : 97% hexane 3% IPA ester esmolol sep, in IPA
=====

```

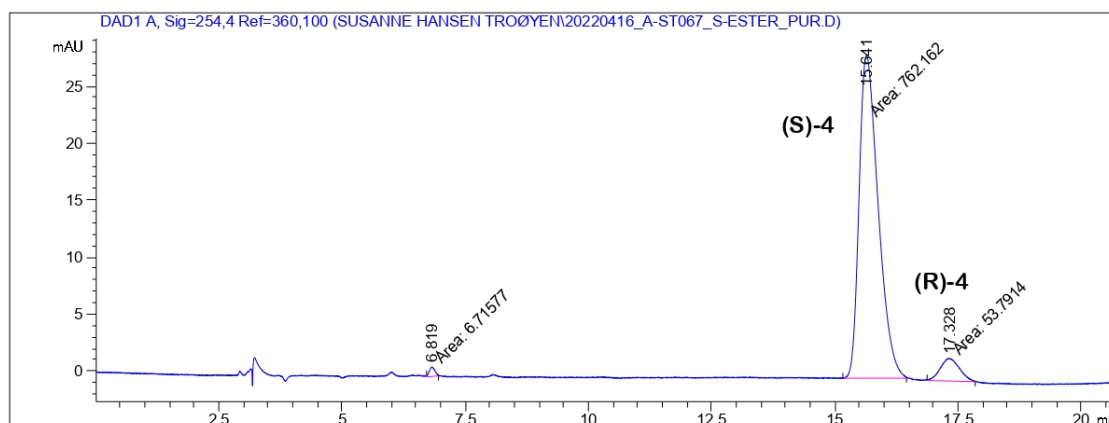

## Area Percent Report

```

=====
Sorted By      : Signal
Multiplier     : 1.0000
Dilution       : 1.0000
Use Multiplier & Dilution Factor with ISTDs
=====

```

Signal 1: DAD1 A, Sig=254,4 Ref=360,100

| Peak # | RetTime [min] | Type | Width [min] | Area [mAU*s] | Height [mAU] | Area %  |
|--------|---------------|------|-------------|--------------|--------------|---------|
| 1      | 6.819         | MM   | 0.1314      | 6.71577      | 8.51701e-1   | 0.8163  |
| 2      | 15.641        | MM   | 0.4484      | 762.16235    | 28.32586     | 92.6450 |
| 3      | 17.328        | MM   | 0.4503      | 53.79138     | 1.99108      | 6.5386  |

Totals : 822.66950 31.16863

```

=====
*** End of Report ***
=====

```

**Figure S17.** Chiral HPLC chromatogram of *S*-ester (*S*)-4. The analysis was performed on a Chiralcel OD-H column with *n*-hexane and *i*-PrOH (97:3) as eluent and 1 mL/min flow, and with a detection wavelength of 254 nm. The retention times obtained are  $t_R((S)\text{-}4) = 15.6$  min and  $t_R((R)\text{-}4) = 17.3$  min.  $R_S((S)/(R)\text{-}4) = 2.08$ .

**Esmolol (5)**

Data File C:\CHEM32\...\ANNE HANSEN TROØYEN\20211205\_ESMOLOL 2021-12-05 14-13-49\004-0401.D

Sample Name: A-ST023-rac-esmolol

```

=====
Acq. Operator   : Susanne                      Seq. Line :    4
Acq. Instrument : Instrument 1                 Location  : Vial 4
Injection Date  : 05.12.2021 03:42:58         Inj       :    1
                                           Inj Volume: 10 µl

Acq. Method     : C:\Chem32\1\DATA\SUSANNE HANSEN TROØYEN\20211205_ESMOLOL 2021-12-05 14-13-
49\KIRAL_3_DEA.M
Last changed    : 05.12.2021 02:12:28 by Susanne
Analysis Method : C:\CHEM32\1\DATA\SUSANNE HANSEN TROØYEN\20211205_ESMOLOL 2021-12-05 14-13-
49\004-0401.D\DA.M (KIRAL_3_DEA.M)
Last changed    : 15.04.2022 05:17:31 by Lucas
                (modified after loading)
Method Info     : Kiral separasjon med Chiralcel OD-H kolonne 250x4.6mm, 5µm
                Solventer: Heksan + ipa
=====

```

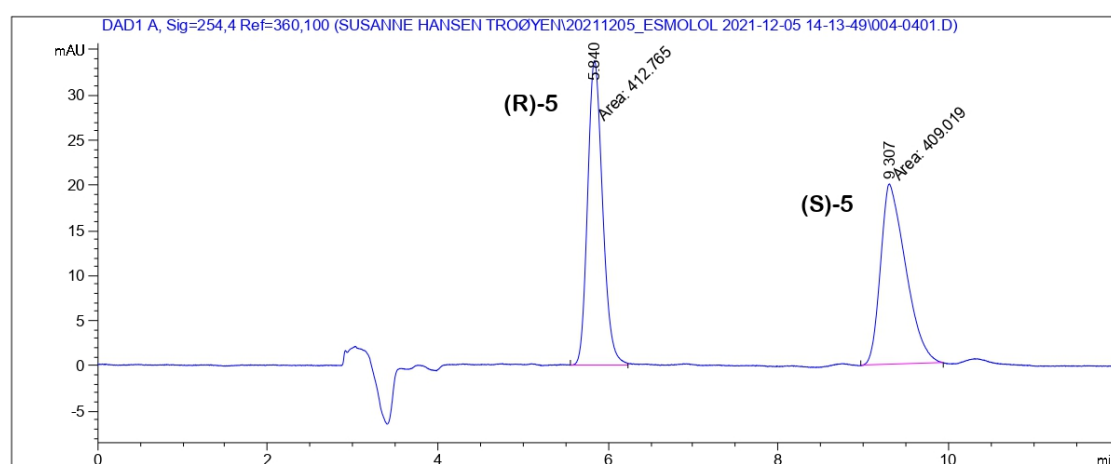

## Area Percent Report

```

=====
Sorted By      :      Signal
Multiplier     :      1.0000
Dilution       :      1.0000
Use Multiplier & Dilution Factor with ISTDs

```

Signal 1: DAD1 A, Sig=254,4 Ref=360,100

| Peak # | RetTime [min] | Type | Width [min] | Area [mAU*s] | Height [mAU] | Area %  |
|--------|---------------|------|-------------|--------------|--------------|---------|
| 1      | 5.840         | MM   | 0.2040      | 412.76514    | 33.72710     | 50.2280 |
| 2      | 9.307         | MM   | 0.3411      | 409.01855    | 19.98699     | 49.7720 |

Totals :                      821.78369    53.71409

```

=====
*** End of Report ***

```

**Figure S18.** Chiral HPLC chromatogram of racemic esmolol **5**. The analysis was performed on a Chiralcel OD-H column with n-hexane:*i*-PrOH:Et<sub>2</sub>NH (80:19.6:0.4) as eluent and 1 mL/min flow, and with a detection wavelength of 254 nm. The retention times obtained are  $t_R((R)\text{-5}) = 5.8$  min and  $t_R((R)\text{-5}) = 9.3$  min.  $R_S((S)/(R)\text{-5}) = 11.5$ .

**(S)-Esmolol ((S)-5)**

Data File C:\CHEM32\1\DATA\SUSANNE HANSEN TROØYEN\20220415\_A-ST069\_S-ESMOLOL\_PUR2.D

Sample Name: A-ST069-S-esmolol\_2

```

=====
Acq. Operator   : Susanne
Acq. Instrument : Instrument 1          Location : Vial 1
Injection Date  : 15.04.2022 04:53:28
                                           Inj Volume : 10 µl
Acq. Method     : C:\CHEM32\1\METHODS\ELISABETH JACOBSEN\KIRAL_3_DEA.M
Last changed    : 15.04.2022 04:48:32 by Susanne
Analysis Method : C:\CHEM32\1\DATA\SUSANNE HANSEN TROØYEN\20220415_A-ST069_S-ESMOLOL_PUR2.D\
                  DA.M (KIRAL_3_DEA.M)
Last changed    : 15.04.2022 05:07:29 by Lucas
Method Info     : Kiral separasjon med Chiralcel OD-H kolonne 250x4.6mm, 5µm
                  Solventer: Heksan + ipa

Sample Info     : 80% hexane 20% IPA w 2% DEA esmolol sep, in IPA
                  Purified by TLC, lower c
=====

```

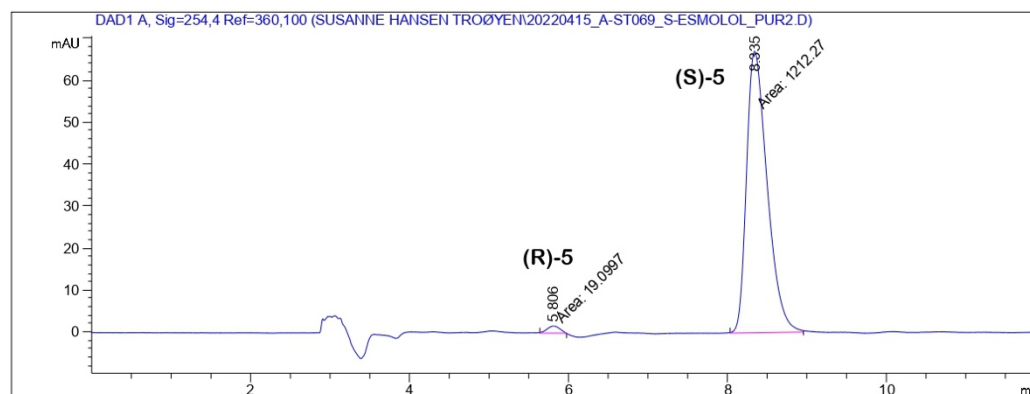

## Area Percent Report

```

=====
Sorted By      : Signal
Multiplier     : 1.0000
Dilution       : 1.0000
Use Multiplier & Dilution Factor with ISTDs
=====

```

Signal 1: DAD1 A, Sig=254,4 Ref=360,100

| Peak # | RetTime [min] | Type | Width [min] | Area [mAU*s] | Height [mAU] | Area %  |
|--------|---------------|------|-------------|--------------|--------------|---------|
| 1      | 5.806         | MM   | 0.1823      | 19.09973     | 1.74640      | 1.5511  |
| 2      | 8.335         | MM   | 0.3010      | 1212.27112   | 67.12397     | 98.4489 |

Totals : 1231.37085 68.87037

\*\*\* End of Report \*\*\*

**Figure S19.** Chiral HPLC chromatogram of (S)-esmolol (S)-5. The analysis was performed on a Chiralcel OD-H column with n-hexane:*i*-PrOH:Et<sub>2</sub>NH (80:19.6:0.4) as eluent and 1 mL/min flow, and with a detection wavelength of 254 nm. The retention times obtained are  $t_{R}((R)\text{-}5) = 5.8$  min and  $t_{R}((S)\text{-}5) = 8.3$  min.  $R_S((S)/(R)\text{-}5) = 11.5$ .

3,3'-(((2-Hydroxypropane-1,3-diyl)bis(oxy))bis(4,1-phenylene))dipropionate (**3d**)

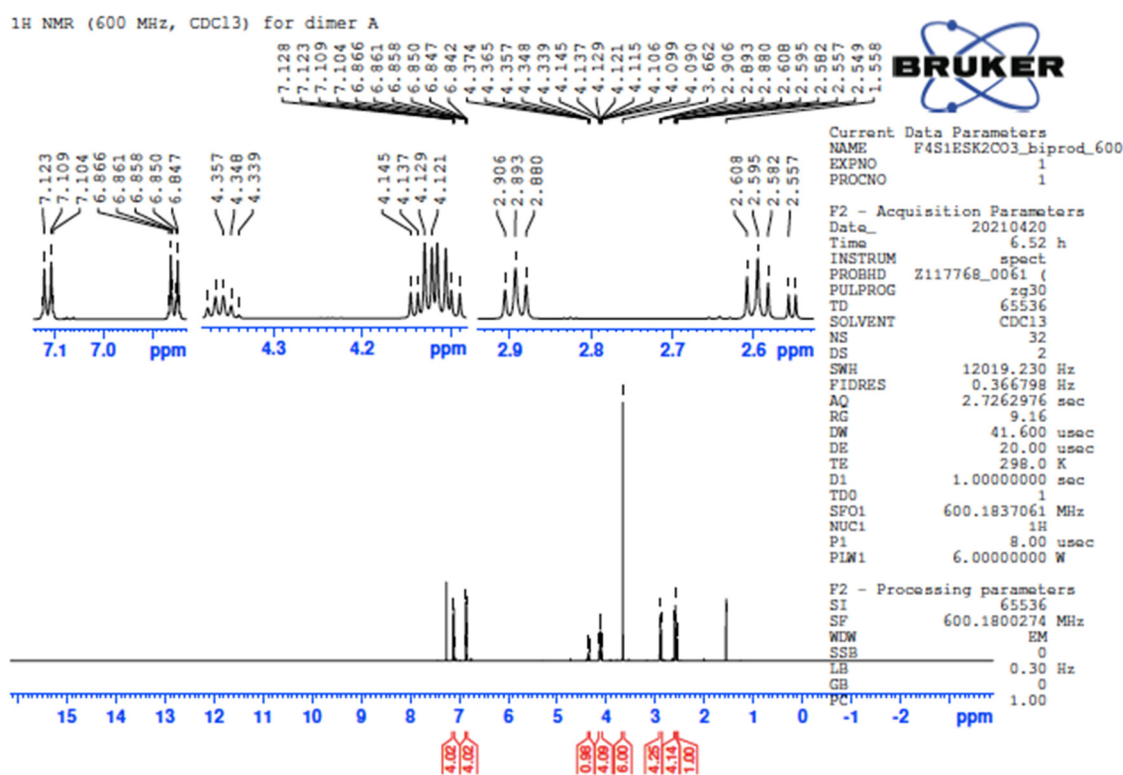

**Figure S20.** <sup>1</sup>H-NMR spectrum (600 MHz, CDCl<sub>3</sub>) of dimer **3d**.  $\delta = 1.56$  ppm corresponds to water from the solvent.

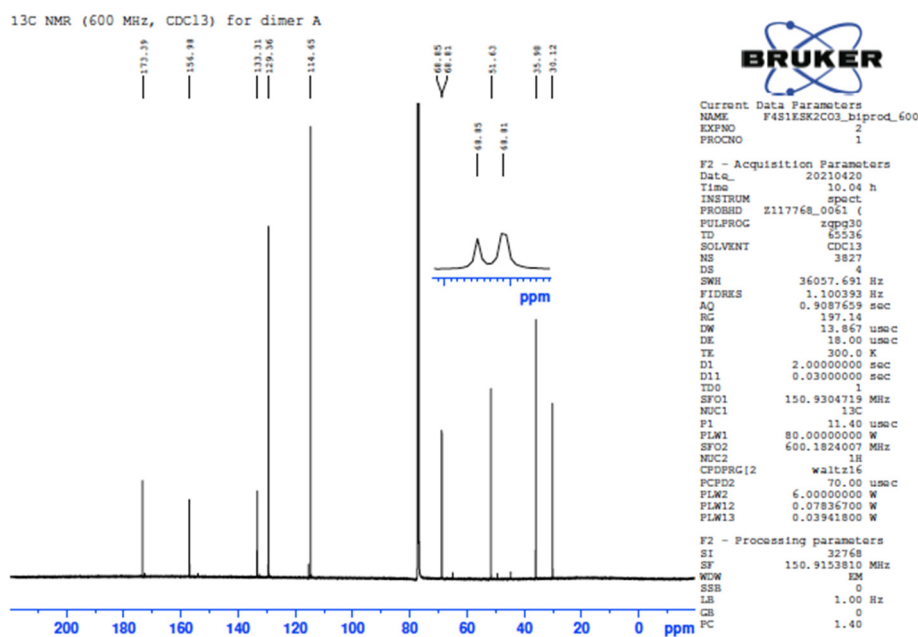

**Figure S21.** <sup>13</sup>C-NMR spectrum (600 MHz, CDCl<sub>3</sub>) of dimer **3d**.

## Elemental Composition Report

Page 1

## Single Mass Analysis

Tolerance = 10.0 PPM / DBE: min = -1.5, max = 50.0

Element prediction: Off

Number of isotope peaks used for I-FIT = 3

Monoisotopic Mass, Even Electron Ions

423 formula(e) evaluated with 5 results within limits (up to 50 closest results for each mass)

Elements Used:

C: 0-500 H: 0-1000 N: 0-1 O: 0-10 Na: 0-1 Cl: 0-1

SVG\_20210325\_DILUT\_Arme\_2Karbonate 226 (4.180) AM2 (Ar,35000.0,0.00,0.00)

1: TOF MS ES+

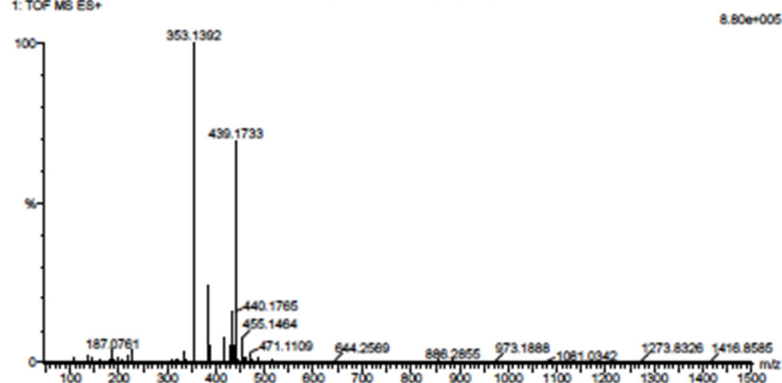

| Minimum: |            |      |      |      |       |        |         |                  |  |  |
|----------|------------|------|------|------|-------|--------|---------|------------------|--|--|
| Maximum: |            |      |      |      |       |        |         |                  |  |  |
|          |            |      |      |      |       |        |         |                  |  |  |
| Mass     | Calc. Mass | mDa  | PPM  | DBE  | i-FIT | Norm   | Conf(%) | Formula          |  |  |
| 439.1733 | 439.1733   | 0.0  | 0.0  | 9.5  | 813.1 | 0.047  | 95.45   | C23 H28 O7 Na    |  |  |
| 439.1735 | 439.1735   | -0.2 | -0.5 | 3.5  | 833.5 | 20.417 | 0.00    | C19 H32 O9 Cl    |  |  |
| 439.1711 | 439.1711   | 2.2  | 5.0  | 0.5  | 833.6 | 20.521 | 0.00    | C17 H33 O9 Na Cl |  |  |
| 439.1757 | 439.1757   | -2.4 | -5.5 | 12.5 | 816.2 | 3.113  | 4.45    | C25 H27 O7       |  |  |
| 439.1698 | 439.1698   | 3.5  | 8.0  | 21.5 | 820.0 | 6.925  | 0.10    | C32 H23 O2       |  |  |

Figure S22. MS-spectrum of dimer A with  $m/z = 416.46$ 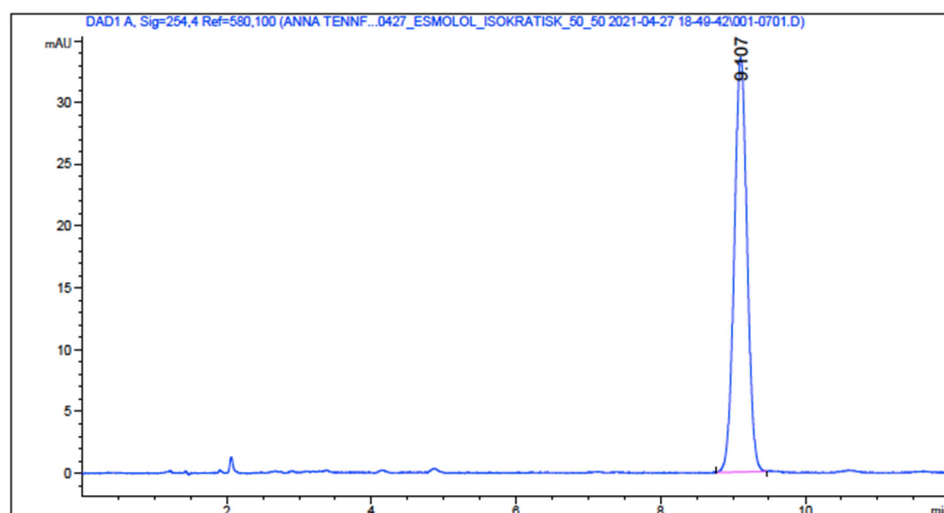Figure S23. Achiral HPLC of isolated dimer A ( $t_R = 9.1$  min) performed on an ACE Excel 5 C18 column with an isocratic mobile phase composition of water and acetonitrile (50:50) over 12 min, flow 1 mL/min.



*1-chloro-3-(2-cyclopentylphenoxy)propan-2-ol (8)*

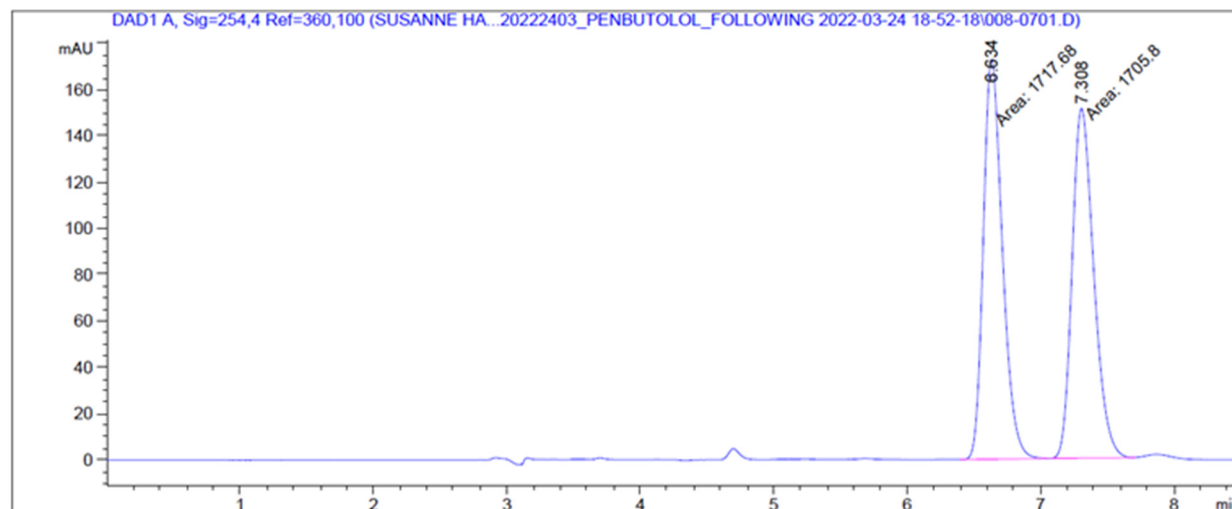

**Figure S24.** Chiral HPLC chromatogram of chlorohydrin **8**. The analysis was performed on a Chiralcel OD-H column with hexane and 2-propanol (90:10) as eluent and 1 mL/min flow, and with a detection wavelength of 280.8 nm. The retention times obtained are  $t_R((S)\text{-}\mathbf{8}) = 6.63$  min and  $t_R((R)\text{-}\mathbf{8}) = 7.31$  min.  $R_S((S)/(R)\text{-}\mathbf{8}) = 2.41$ .

*(S)-1-chloro-3-(2-cyclopentylphenoxy)propan-2-ol ((S)-8)*

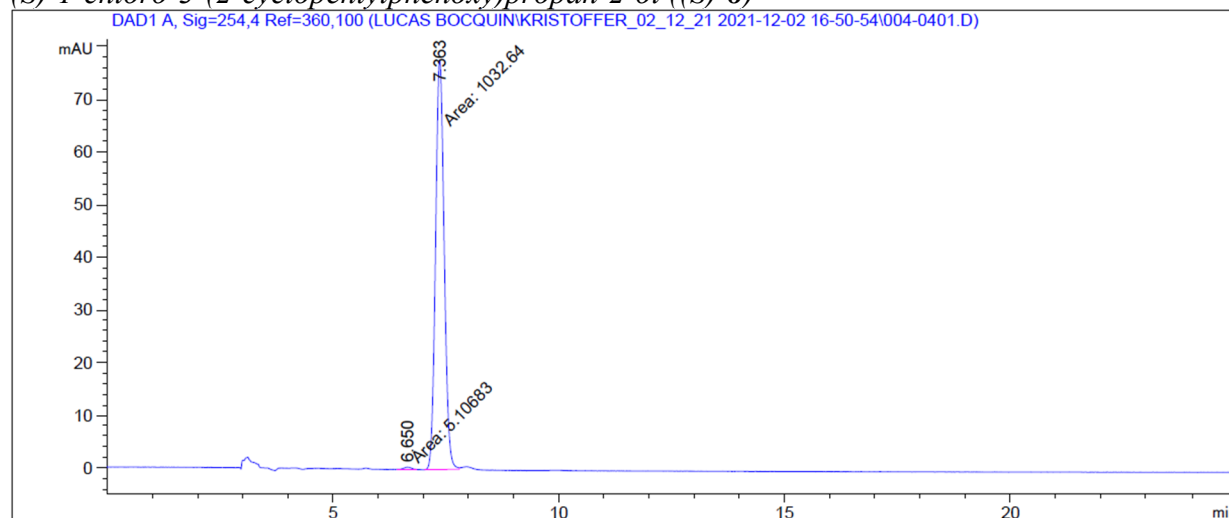

**Figure S25.** Chiral HPLC chromatogram of enantiopure chlorohydrin *(S)*-**8** obtained by the CALB catalysed kinetic resolution of racemic chlorohydrin **8**. The analysis was performed on a Chiralcel OD-H column with hexane and 2-propanol (90:10) as eluent and 1 mL/min flow, and with a detection wavelength of 280.8 nm.



*Penbutolol (10)*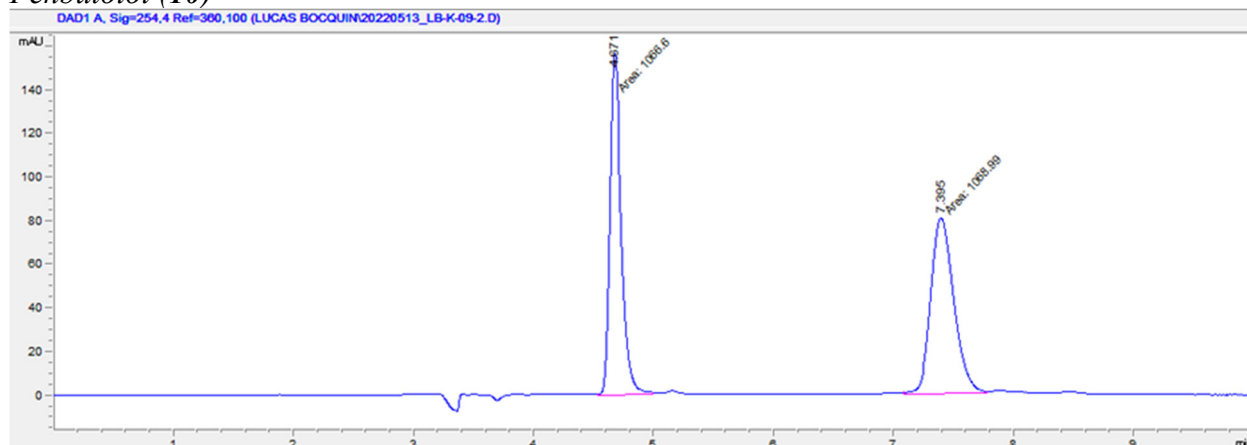

**Figure S26.** Chiral HPLC chromatogram of racemic of racemic penbutolol (**10**). The analysis was performed on a Chiralcel OD-H column with hexane (90%) and 2-propanol containing 2% diethanolamine (10%) as eluent and 1 mL/min flow, and with a detection wavelength of 254.4 nm. The retention times obtained are  $t_R((R)\text{-10}) = 4.671$  min and  $t_R((S)\text{-10}) = 7.395$  min.  $R_S((S)/(R)\text{-10}) = 10.5$ .

*(S)-Penbutolol ((S)-10)*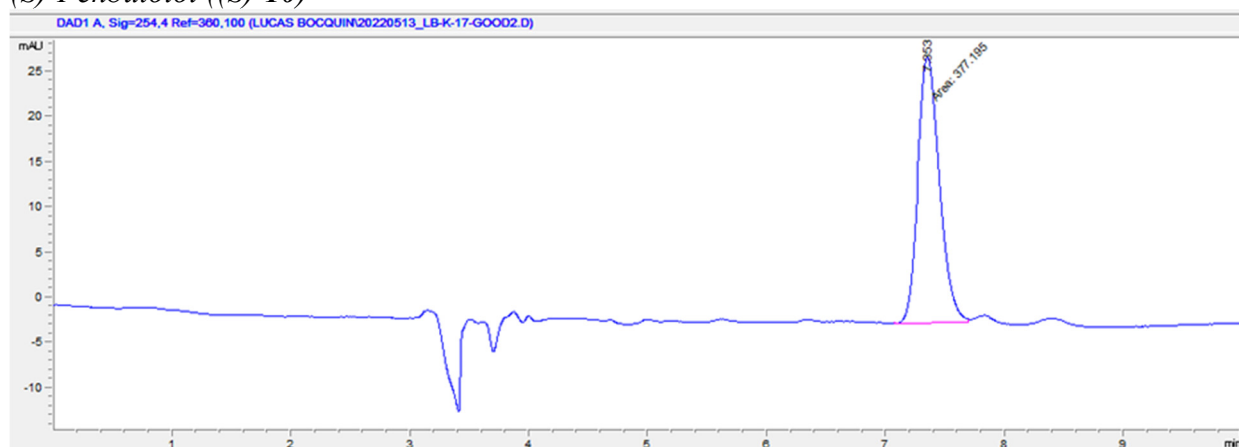

**Figure S27.** Chiral HPLC chromatogram of enantiopure (*S*)-penbutolol (*(S)*-**10**). The analysis was performed on a Chiralcel OD-H column with hexane (90%) and 2-propanol containing 2% diethanolamine (10%) as eluent and 1 mL/min flow, and with a detection wavelength of 254.4 nm.
